# Supplementary material for: Modulation of singlet and triplet excited states through σ spacers in ternary 1,3,5-triazines
Source: Royal Society of Chemistry journal article supplement (doi:10.1039/c3ra41888j), 2013-01-01
Supplement: c3ra41888j.pdf [file c3ra41888j.pdf]

## Modulation of Singlet and Triplet Excited States Through $\sigma$ Spacers in Ternary 1,3,5-Triazines

Zhongfu An<sup>a</sup>, Qingyang Wu<sup>b</sup>, Jianjian Xiao<sup>a</sup>, Runfeng Chen<sup>\*a</sup>, Jun Yin<sup>a</sup>, Huifang Shi<sup>a</sup>, Ye Tao<sup>a</sup>, Yang Wang<sup>a</sup>, Zhixiang Wang<sup>a</sup>, Huanhuan Li<sup>a</sup>, Hongmei Zhang<sup>a</sup>, Xinhui Zhou<sup>a</sup>, Yi Zhao<sup>\*b</sup>, Wei Huang<sup>\*a, c</sup>

<sup>a</sup>Key Laboratory for Organic Electronics & Information Displays (KLOEID) and Institute of Advanced Materials (IAM), Nanjing University of Posts and Telecommunications (NUPT), 9 Wenyuan Road, Nanjing, 210023, P.R. China

<sup>b</sup>State Key Laboratory on Integrated Optoelectronics, College of Electronic Science and Engineering, Jilin University, 2699 Qianjin Street, Changchun, 130012, P.R. China

<sup>c</sup>Jiangsu-Singapore Joint Research Centre for Organic/Bio- Electronics & Information Display and Institute of Advanced Materials (IAM), Nanjing University of Technology, Nanjing, 211816, P.R. China

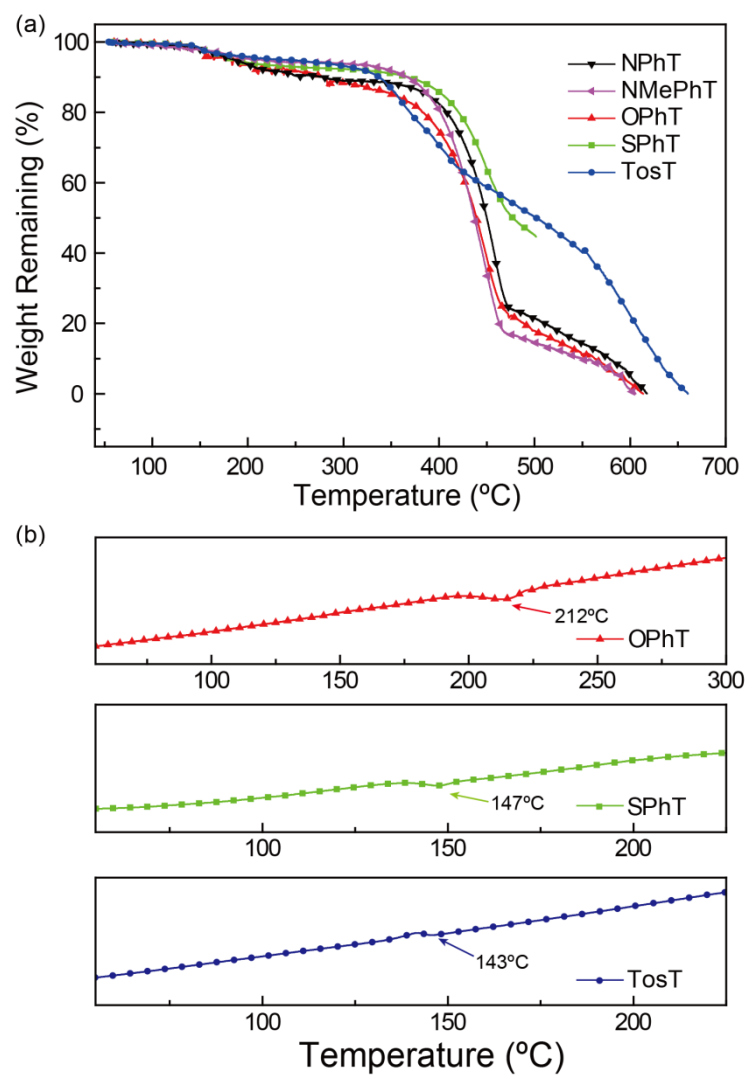

**Figure S1.** Thermal properties of  $\sigma$ -spaced triazines. (a) TGA and (b) DSC curves

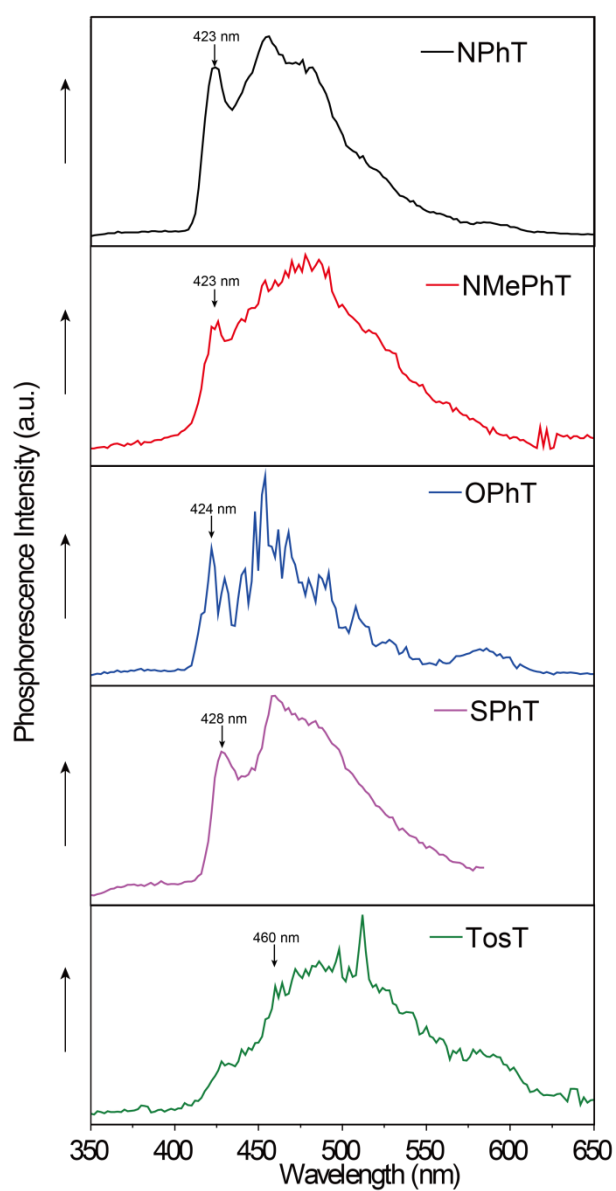

**Figure S2.** The normalized phosphorescent spectra of  $\sigma$ -spaced triazines in chloroform glass at 77 K after a delay of 5 ms.

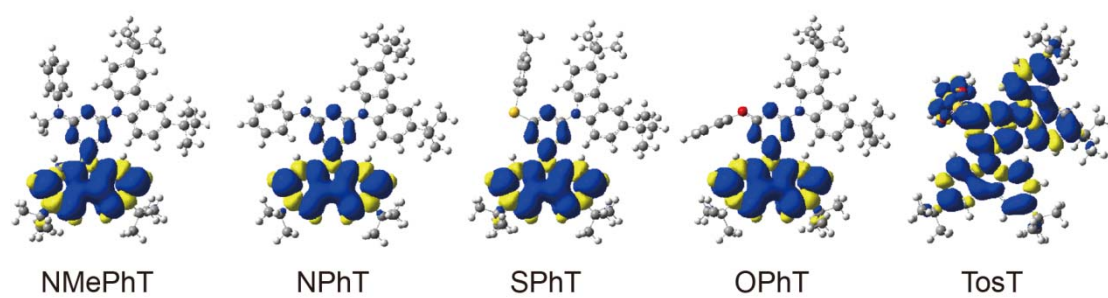

**Figure S3.** Spin density distribution of  $\sigma$ -spaced triazines

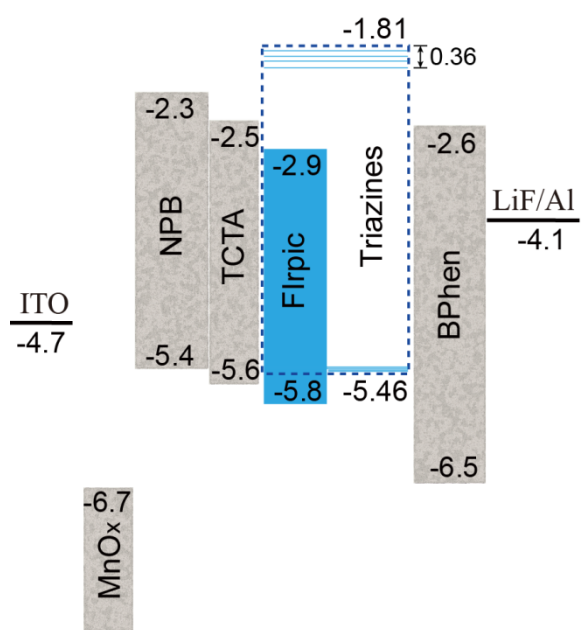

**Figure S4.** Energy level diagram of the device configurations

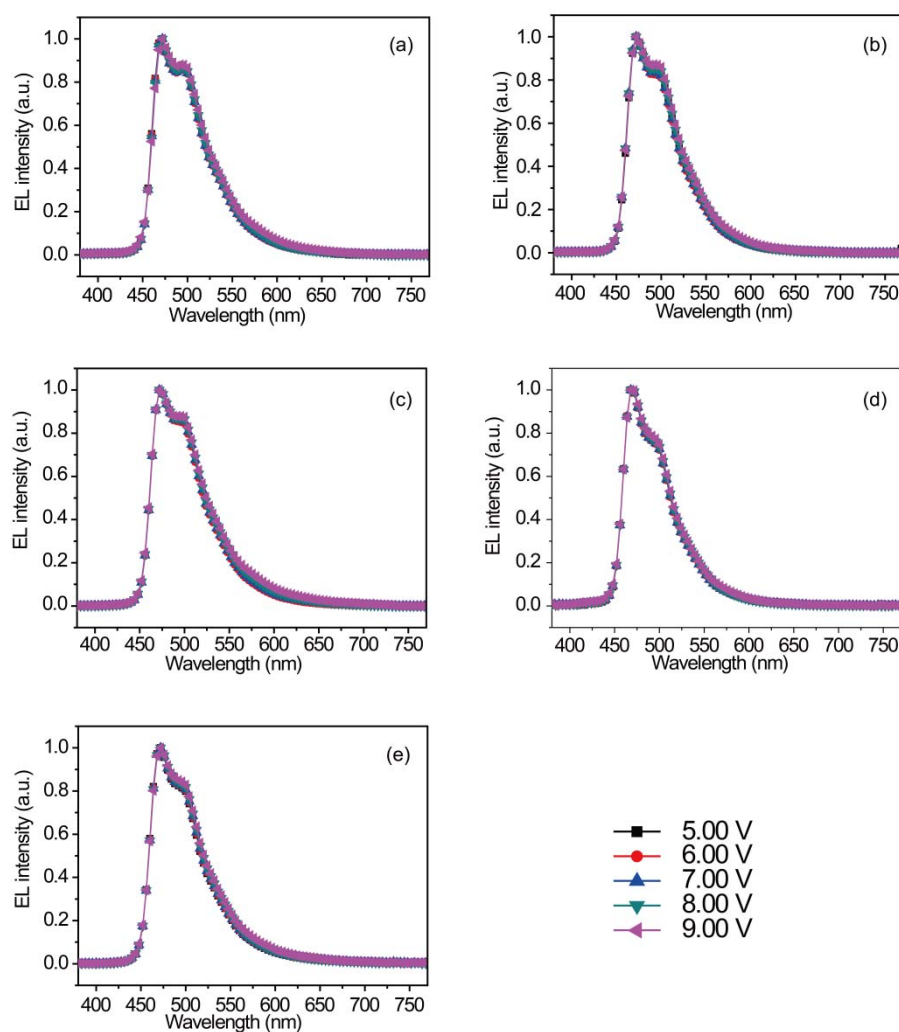

**Figure S5.** EL spectra of (a) NPhT, (b) NMePhT, (c) OPhT, (d) SPhT and (e) TosT at different voltages

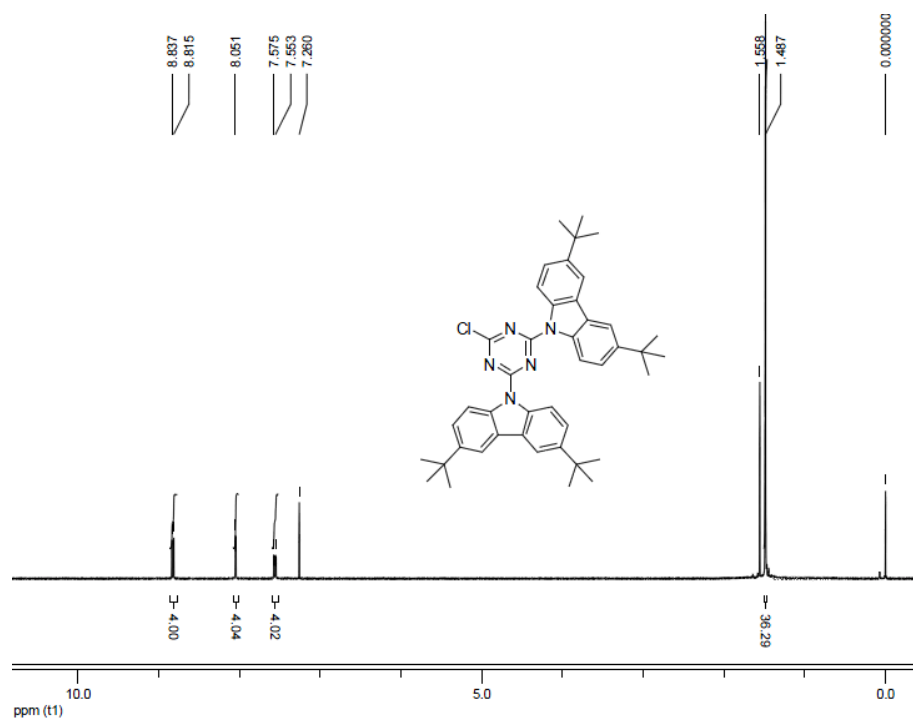

**Figure S6-1.** <sup>1</sup>H NMR spectrum of CIT in CDCl<sub>3</sub>

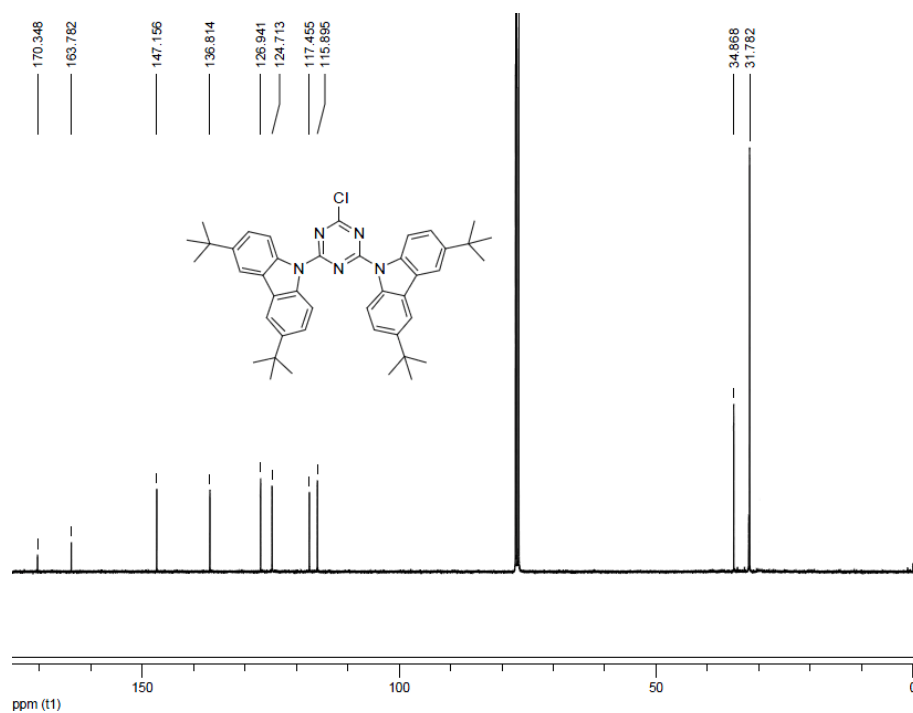

**Figure S6-2.** <sup>13</sup>C NMR spectrum of CIT in CDCl<sub>3</sub>

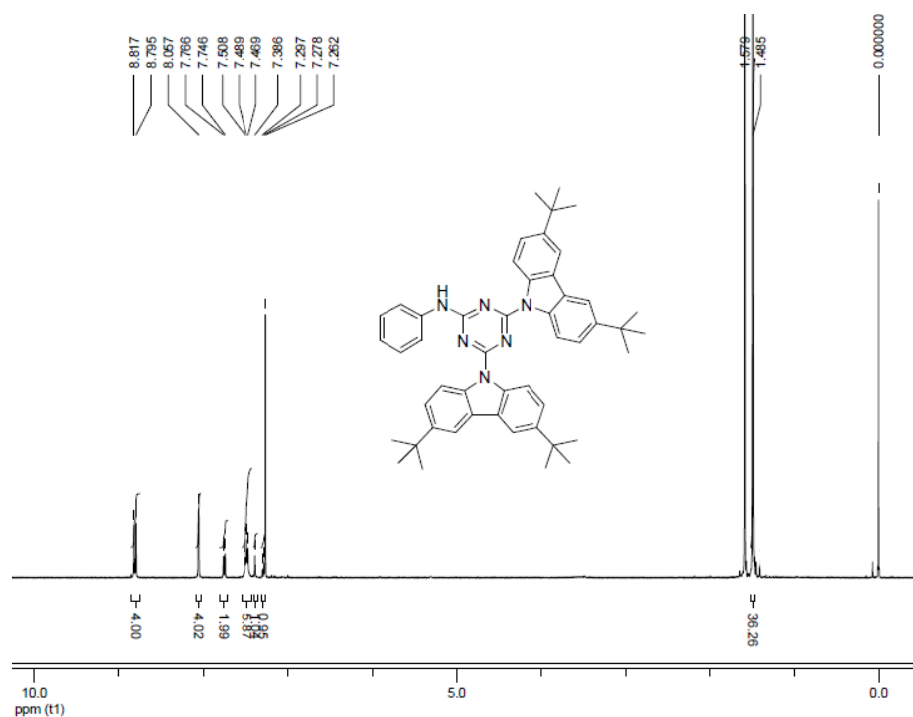

**Figure S7-1.**  $^1\text{H}$  NMR spectrum of NPhT in  $\text{CDCl}_3$

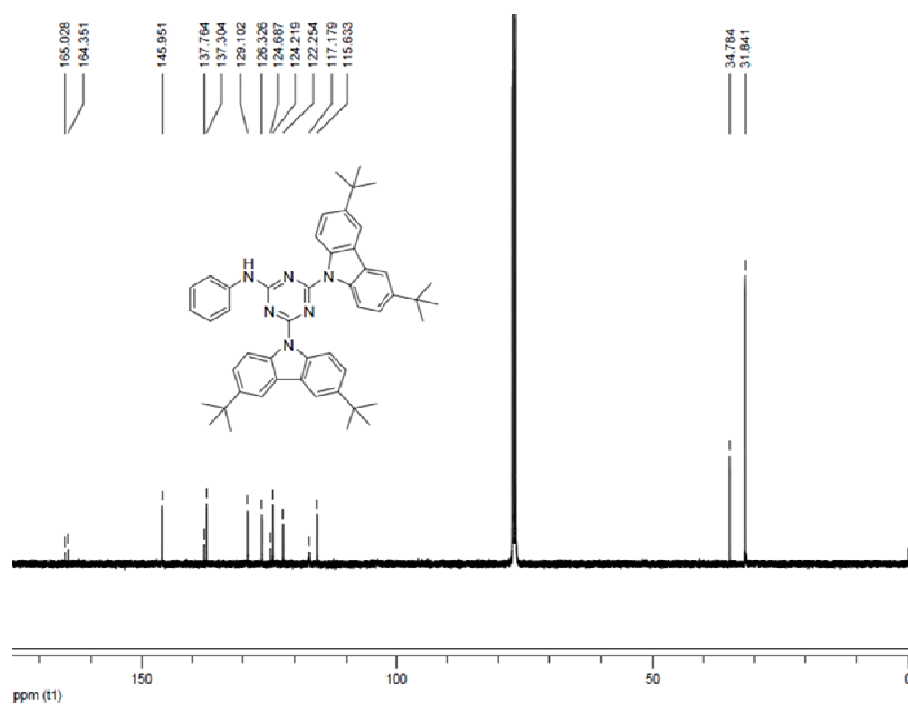

**Figure S7-2.**  $^{13}\text{C}$  NMR spectrum of NPhT in  $\text{CDCl}_3$



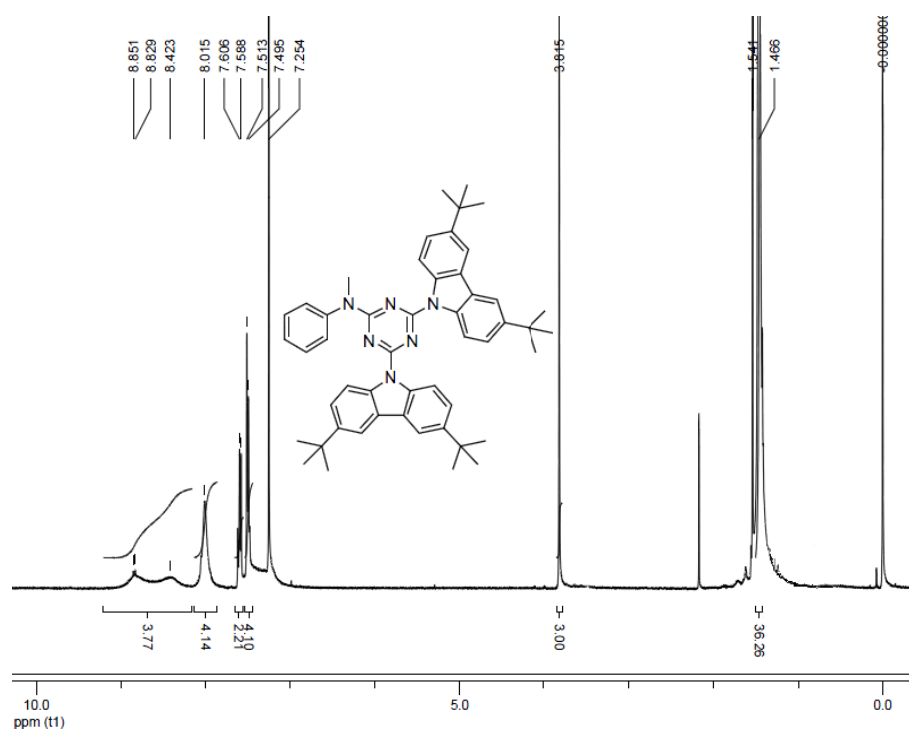

**Figure S8-1.** <sup>1</sup>H NMR spectrum of NMePhT in CDCl<sub>3</sub>

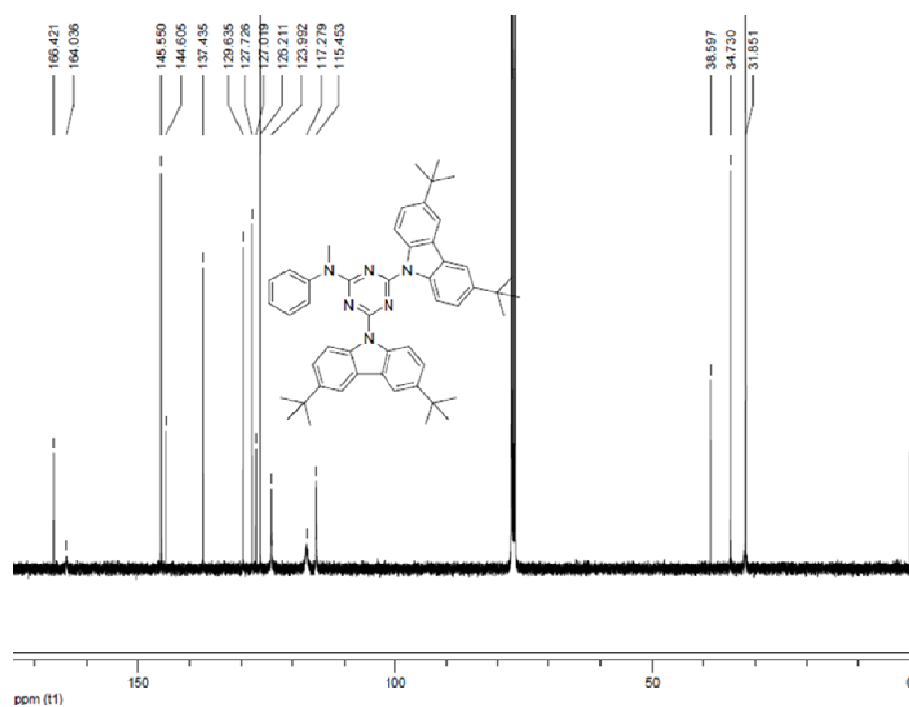

**Figure S8-2.** <sup>13</sup>C NMR spectrum of NMePhT in CDCl<sub>3</sub>

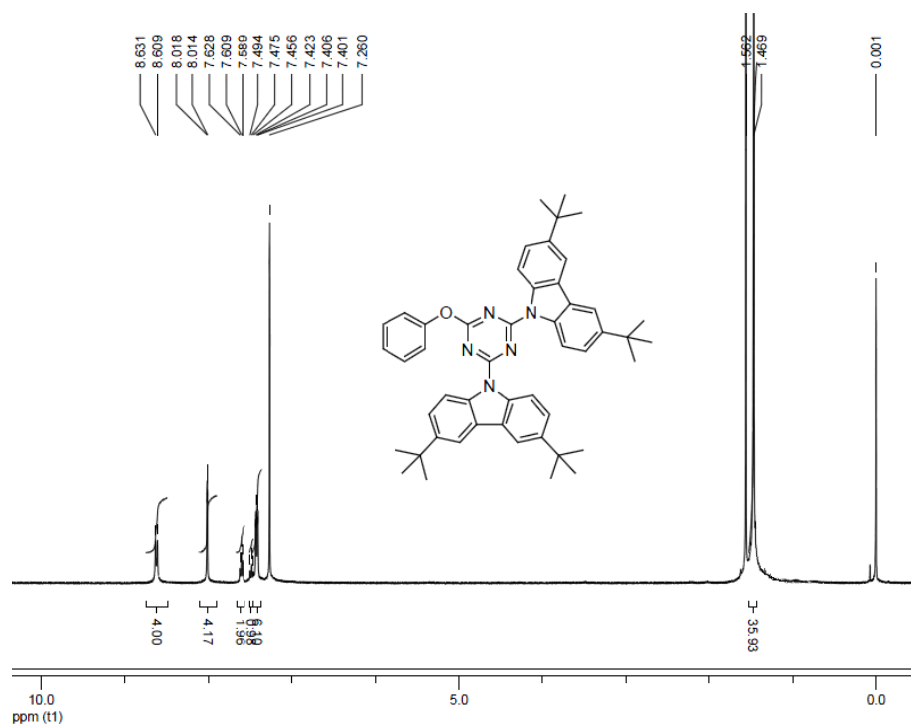

**Figure S9-1.** <sup>1</sup>H NMR spectrum of OPhT in CDCl<sub>3</sub>

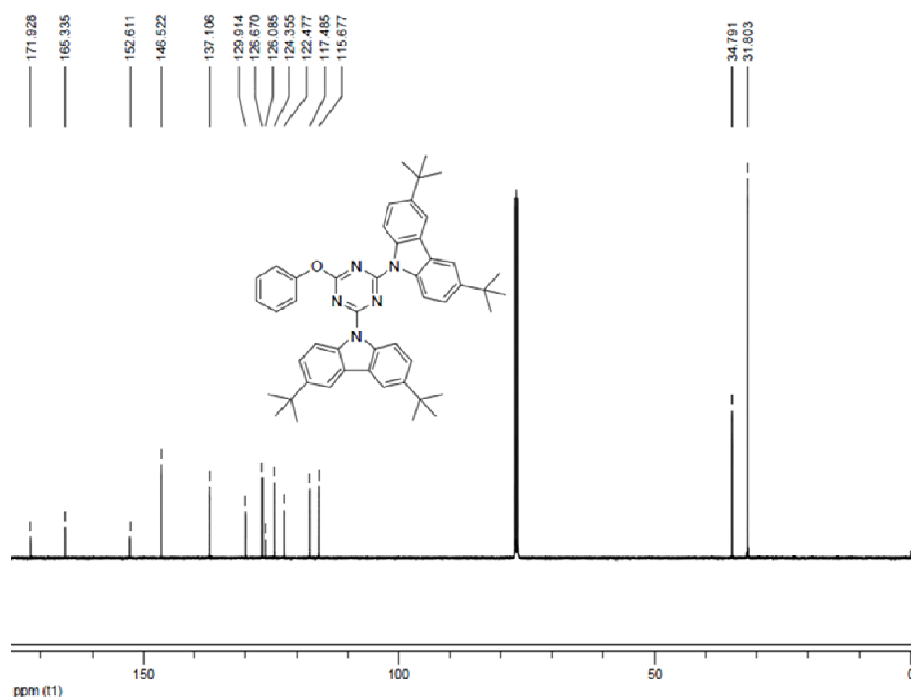

**Figure S9-2.** <sup>13</sup>C NMR spectrum of OPhT in CDCl<sub>3</sub>

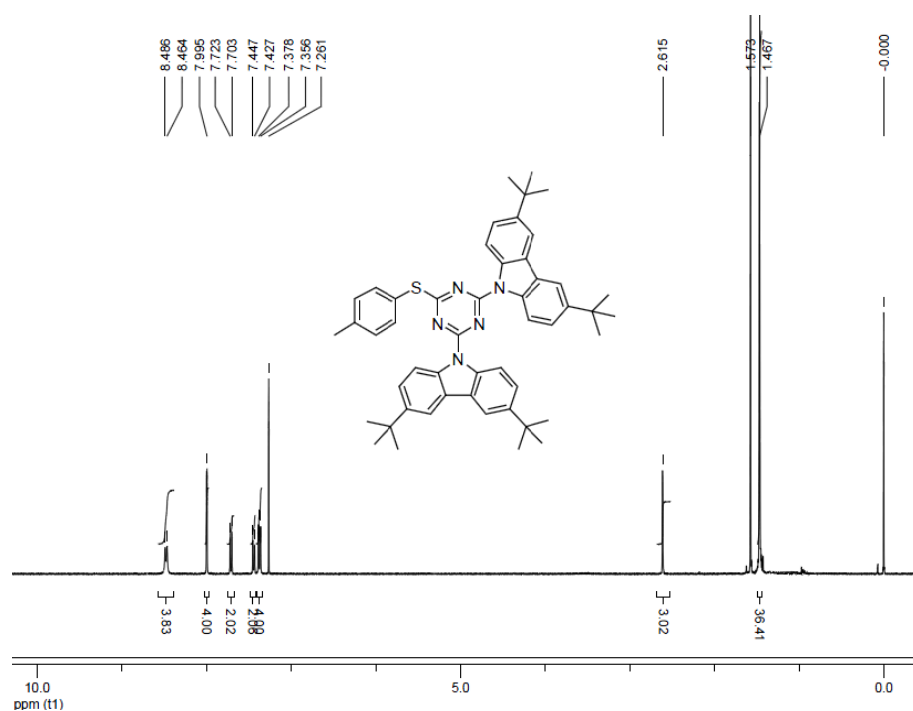

**Figure S10-1.**  $^1\text{H}$  NMR spectrum of SPhT in  $\text{CDCl}_3$

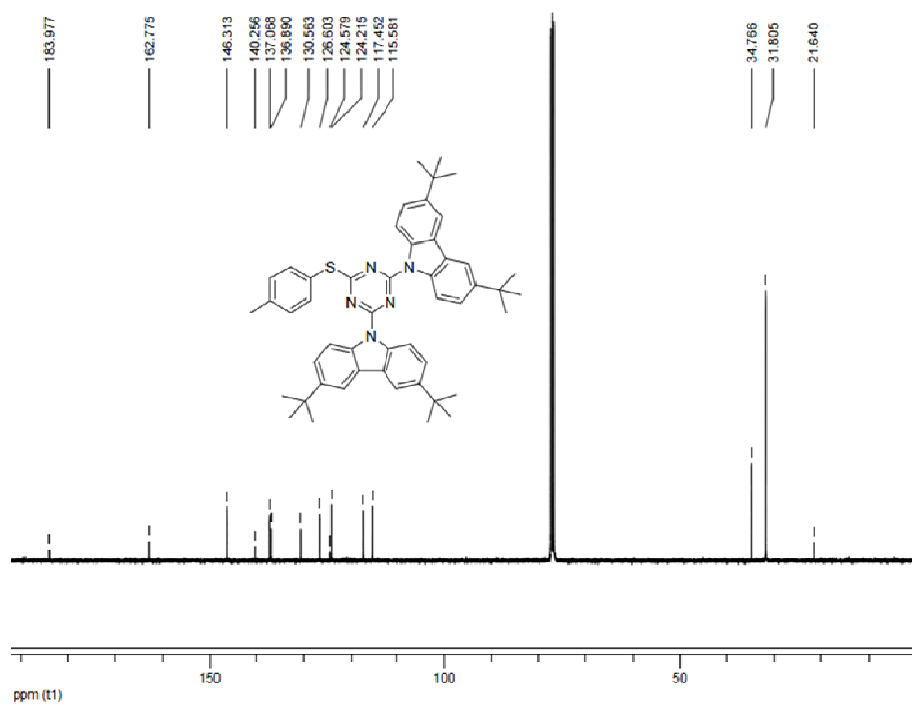

**Figure S10-2.**  $^{13}\text{C}$  NMR spectrum of SPhT in  $\text{CDCl}_3$

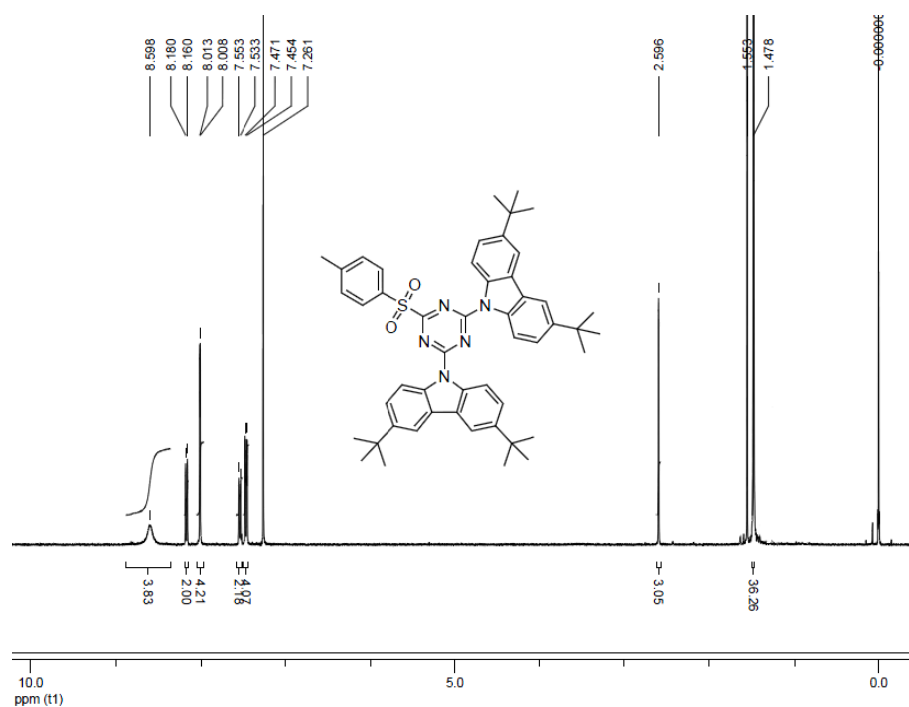

**Figure S11-1.** <sup>1</sup>H NMR spectrum of TosT in CDCl<sub>3</sub>

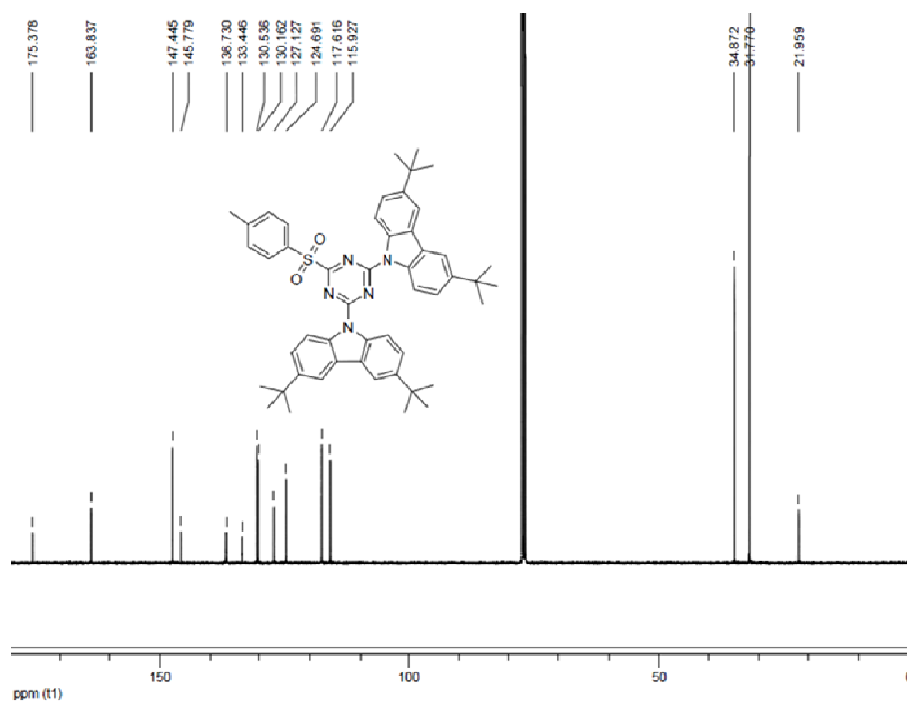

**Figure S11-2.** <sup>13</sup>C NMR spectrum of TosT in CDCl<sub>3</sub>

**Table S1.** Electroluminescent performance of the  $\sigma$ -spaced triazine hosts for FIrpic-based PhOLEDs.

| Host   | $\eta_{\max}$<br>[cd/A] <sup>[a]</sup> | $V_{\text{turn-on}}$<br>[V] | $B$<br>[cd/m <sup>2</sup> ] <sup>[b]</sup> | EQE <sub>max</sub><br>[%] <sup>[c]</sup> |
|--------|----------------------------------------|-----------------------------|--------------------------------------------|------------------------------------------|
| NPhT   | 1.7                                    | <5.0                        | 825                                        | 0.6                                      |
| NMePhT | 4.9                                    | <5.0                        | 2628                                       | 2.0                                      |
| OPhT   | 6.2                                    | <4.0                        | 815                                        | 1.9                                      |
| SPhT   | 1.6                                    | <5.0                        | 647                                        | 1.0                                      |
| TosT   | 1.9                                    | <4.5                        | 610                                        | 0.87                                     |

<sup>[a]</sup> Maximum current efficiency. <sup>[b]</sup> Luminance at 8.5 V. <sup>[c]</sup> External quantum efficiency
